# Supplementary material
Source: publisher site journal article supplement (https://www.dovepress.com/article/591621)
Supplement: Supplementary file 1 [file 591621%20Supplementary%20Files_1.pdf]

**Table S1: Deidentified participant data**

| No. | Gender | Age | ASA | Height/cm | Weight/kg | BMI | Inclusion time | Testing Time |
|-----|--------|-----|-----|-----------|-----------|-----|----------------|--------------|
| 1   | female | 44  | 2   | 163       | 58        | 22  | 20240411       | 14:28        |
| 2   | male   | 54  | 2   | 170       | 65        | 22  | 20240411       | 13:04        |
| 3   | female | 43  | 2   | 160       | 53        | 21  | 20240411       | 13:07        |
| 4   | female | 65  | 2   | 157       | 69        | 28  | 20240411       | 15:01        |
| 5   | male   | 65  | 2   | 170       | 69        | 24  | 20240411       | 14:40        |
| 6   | female | 65  | 2   | 153       | 60        | 26  | 20240425       | 13:19        |
| 7   | female | 42  | 2   | 160       | 65        | 25  | 20240425       | 14:26        |
| 8   | male   | 58  | 2   | 168       | 80        | 28  | 20240425       | 15:33        |
| 9   | female | 62  | 2   | 163       | 66.5      | 25  | 20240425       | 13:53        |
| 10  | male   | 44  | 2   | 170       | 90        | 31  | 20240425       | 14:40        |
| 11  | female | 59  | 2   | 155       | 55        | 23  | 20240516       | 14:32        |
| 12  | female | 65  | 2   | 158       | 89        | 36  | 20240516       | 14:04        |
| 13  | female | 57  | 2   | 155       | 60        | 25  | 20240516       | 14:48        |
| 14  | female | 54  | 2   | 162       | 66        | 25  | 20240516       | 14:56        |
| 15  | female | 47  | 2   | 173       | 78        | 26  | 20240516       | 15:15        |
| 16  | female | 63  | 2   | 166       | 65        | 24  | 20240516       | 8:30         |
| 17  | male   | 65  | 2   | 160       | 45        | 18  | 20240516       | 8:07         |
| 18  | female | 65  | 2   | 155       | 57        | 24  | 20240523       | 14:05        |
| 19  | female | 48  | 2   | 165       | 59        | 22  | 20240523       | 13:24        |
| 20  | male   | 43  | 2   | 179       | 76        | 24  | 20240523       | 13:21        |
| 21  | female | 57  | 2   | 155       | 65        | 27  | 20240523       | 14:09        |
| 22  | female | 38  | 2   | 163       | 55        | 21  | 20240523       | 14:32        |
| 23  | male   | 60  | 2   | 175       | 99        | 32  | 20240523       | 14:48        |
| 24  | male   | 54  | 2   | 160       | 71        | 28  | 20240523       | 15:22        |
| 25  | female | 41  | 2   | 156       | 48        | 20  | 20240530       | 13:22        |
| 26  | female | 58  | 2   | 157       | 60        | 24  | 20240523       | 15:33        |
| 27  | female | 41  | 2   | 163       | 61        | 23  | 20240530       | 14:53        |
| 28  | female | 29  | 2   | 160       | 51        | 20  | 20240530       | 13:52        |
| 29  | male   | 43  | 2   | 168       | 54        | 19  | 20240530       | 14:21        |
| 30  | female | 43  | 2   | 162       | 58        | 22  | 20240530       | 14:45        |
| 31  | female | 60  | 2   | 165       | 56        | 21  | 20240530       | 15:07        |
| 32  | female | 59  | 2   | 150       | 45        | 20  | 20240530       | 14:16        |
| 33  | female | 46  | 2   | 162       | 62        | 24  | 20240606       | 13:10        |
| 34  | female | 47  | 2   | 166       | 65        | 24  | 20240606       | 13:25        |
| 35  | female | 56  | 2   | 153       | 60        | 26  | 20240606       | 13:42        |
| 36  | female | 38  | 2   | 155       | 51        | 21  | 20240606       | 14:47        |

| No. | Dosage of analgesic drugs/mg | Total dosage of propofol used/mg | Duration of anesthesia/min | Colonoscopy time/min | HR(T1) | HR(T2) | HR(T3) | HR(T4) |
|-----|------------------------------|----------------------------------|----------------------------|----------------------|--------|--------|--------|--------|
| 1   | 3.5                          | 30                               | 15                         | 14                   | 65     | 66     | 61     | 56     |
| 2   | 5.2                          | 70                               | 30                         | 28                   | 98     | 95     | 83     | 81     |
| 3   | 3.71                         | 90                               | 18                         | 13                   | 94     | 114    | 88     | 89     |
| 4   | 4                            | 40                               | 31                         | 29                   | 67     | 66     | 70     | 66     |
| 5   | 4.9                          | 60                               | 24                         | 21                   | 91     | 85     | 85     | 84     |
| 6   | 4.2                          | 50                               | 28                         | 26                   | 81     | 73     | 71     | 68     |
| 7   | 3.5                          | 30                               | 10                         | 8                    | 73     | 67     | 69     | 59     |
| 8   | 4                            | 50                               | 17                         | 16                   | 92     | 88     | 102    | 82     |
| 9   | 4                            | 50                               | 24                         | 8                    | 68     | 60     | 65     | 69     |
| 10  | 4.8                          | 30                               | 12                         | 9                    | 93     | 80     | 96     | 91     |
| 11  | 2.2                          | 50                               | 13                         | 11                   | 85     | 78     | 80     | 71     |
| 12  | 4.5                          | 60                               | 19                         | 17                   | 67     | 71     | 66     | 56     |
| 13  | 3.0                          | 80                               | 17                         | 16                   | 67     | 69     | 71     | 72     |
| 14  | 2.64                         | 30                               | 20                         | 5                    | 66     | 62     | 61     | 63     |
| 15  | 3.9                          | 70                               | 15                         | 13                   | 63     | 64     | 63     | 52     |
| 16  | 3.25                         | 50                               | 23                         | 14                   | 84     | 87     | 91     | 73     |
| 17  | 2.25                         | 100                              | 50                         | 37                   | 53     | 50     | 56     | 56     |
| 18  | 2.28                         | 50                               | 29                         | 21                   | 72     | 83     | 76     | 79     |
| 19  | 1.8                          | 150                              | 31                         | 29                   | 70     | 66     | 63     | 62     |
| 20  | 2.28                         | 100                              | 20                         | 19                   | 94     | 83     | 81     | 77     |
| 21  | 2.6                          | 100                              | 16                         | 12                   | 90     | 90     | 89     | 85     |
| 22  | 2.75                         | 100                              | 19                         | 17                   | 73     | 71     | 67     | 65     |
| 23  | 5                            | 40                               | 27                         | 18                   | 95     | 93     | 76     | 73     |
| 24  | 3.55                         | 20                               | 24                         | 22                   | 64     | 60     | 71     | 73     |
| 25  | 2.4                          | 80                               | 21                         | 12                   | 108    | 82     | 81     | 64     |
| 26  | 2.4                          | 60                               | 26                         | 25                   | 68     | 81     | 74     | 72     |
| 27  | 3                            | 100                              | 20                         | 18                   | 103    | 90     | 89     | 78     |
| 28  | 3                            | 40                               | 18                         | 10                   | 77     | 74     | 95     | 87     |
| 29  | 2.7                          | 50                               | 10                         | 8                    | 84     | 75     | 74     | 68     |
| 30  | 4                            | 30                               | 14                         | 11                   | 57     | 55     | 61     | 59     |
| 31  | 2.24                         | 50                               | 18                         | 15                   | 56     | 72     | 75     | 72     |
| 32  | 2.8                          | 70                               | 31                         | 28                   | 93     | 81     | 74     | 64     |
| 33  | 3.2                          | 40                               | 13                         | 9                    | 92     | 85     | 89     | 84     |
| 34  | 2.6                          | 30                               | 18                         | 15                   | 58     | 63     | 65     | 61     |
| 35  | 1.8                          | 80                               | 20                         | 14                   | 77     | 77     | 66     | 73     |
| 36  | 1.6                          | 70                               | 11                         | 10                   | 83     | 80     | 79     | 74     |

| No. | HR(T5) | HR(T6) | HR(T7) | HR<50 | MAP(T1) | MAP(T2) | MAP(T3) | MAP(T4) |
|-----|--------|--------|--------|-------|---------|---------|---------|---------|
| 1   | 58     | 54     | 60     | 0     | 68      | 66      | 67      | 61      |
| 2   | 80     | 79     | 80     | 0     | 97      | 90      | 75      | 74      |
| 3   | 79     | 84     | 92     | 0     | 91      | 98      | 67      | 86      |
| 4   | 65     | 70     | 68     | 0     | 118     | 95      | 90      | 90      |
| 5   | 75     | 75     | 74     | 0     | 88      | 56      | 56      | 42      |
| 6   | 67     | 67     | 66     | 0     | 97      | 83      | 74      | 79      |
| 7   | 62     | 63     | 62     | 0     | 86      | 67      | 70      | 71      |
| 8   | 85     | 91     | 84     | 0     | 100     | 87      | 68      | 58      |
| 9   | 70     | 75     | 71     | 0     | 79      | 75      | 73      | 64      |
| 10  | 92     | 87     | 89     | 0     | 94      | 88      | 80      | 82      |
| 11  | 67     | 67     | 67     | 0     | 84      | 71      | 62      | 67      |
| 12  | 54     | 54     | 57     | 0     | 113     | 96      | 71      | 64      |
| 13  | 65     | 81     | 67     | 0     | 87      | 68      | 66      | 62      |
| 14  | 63     | 63     | 64     | 0     | 77      | 54      | 60      | 61      |
| 15  | 57     | 57     | 62     | 0     | 84      | 50      | 61      | 61      |
| 16  | 72     | 74     | 67     | 0     | 88      | 97      | 98      | 97      |
| 17  | 110    | 83     | 105    | 0     | 102     | 75      | 79      | 83      |
| 18  | 73     | 74     | 78     | 0     | 105     | 81      | 79      | 77      |
| 19  | 65     | 61     | 58     | 0     | 73      | 70      | 70      | 86      |
| 20  | 72     | 71     | 72     | 0     | 86      | 83      | 73      | 65      |
| 21  | 69     | 74     | 75     | 0     | 83      | 66      | 58      | 65      |
| 22  | 63     | 66     | 66     | 0     | 83      | 51      | 67      | 77      |
| 23  | 70     | 71     | 67     | 0     | 111     | 95      | 90      | 87      |
| 24  | 71     | 69     | 68     | 0     | 85      | 65      | 65      | 62      |
| 25  | 78     | 80     | 74     | 0     | 87      | 55      | 58      | 61      |
| 26  | 63     | 66     | 82     | 0     | 90      | 60      | 62      | 56      |
| 27  | 81     | 79     | 80     | 0     | 108     | 97      | 79      | 86      |
| 28  | 86     | 84     | 75     | 0     | 75      | 64      | 54      | 58      |
| 29  | 66     | 69     | 72     | 0     | 74      | 55      | 51      | 51      |
| 30  | 60     | 61     | 59     | 0     | 55      | 53      | 50      | 51      |
| 31  | 73     | 71     | 67     | 0     | 92      | 86      | 80      | 82      |
| 32  | 75     | 71     | 75     | 0     | 99      | 56      | 64      | 62      |
| 33  | 89     | 83     | 80     | 0     | 70      | 64      | 62      | 65      |
| 34  | 54     | 65     | 57     | 0     | 75      | 76      | 72      | 65      |
| 35  | 68     | 72     | 65     | 0     | 80      | 73      | 59      | 53      |
| 36  | 73     | 66     | 62     | 0     | 74      | 78      | 67      | 63      |

| No. | MAP(T5) | MAP(T6) | MAP(T7) | LOW<br>MAP(<60m<br>mhg) | SpO2(T1) | SpO2(T2) | SpO2(T3) | SpO2(T4) |
|-----|---------|---------|---------|-------------------------|----------|----------|----------|----------|
| 1   | 67      | 67      | 69      | 0                       | 99       | 98       | 96       | 97       |
| 2   | 71      | 70      | 75      | 0                       | 97       | 98       | 98       | 98       |
| 3   | 116     | 94      | 101     | 0                       | 99       | 99       | 99       | 98       |
| 4   | 90      | 92      | 93      | 0                       | 98       | 96       | 93       | 95       |
| 5   | 39      | 45      | 47      | 1                       | 94       | 95       | 95       | 93       |
| 6   | 76      | 71      | 83      | 0                       | 99       | 99       | 95       | 96       |
| 7   | 62      | 71      | 71      | 0                       | 99       | 98       | 96       | 99       |
| 8   | 73      | 73      | 76      | 1                       | 98       | 98       | 96       | 93       |
| 9   | 69      | 65      | 59      | 1                       | 98       | 99       | 98       | 96       |
| 10  | 82      | 79      | 80      | 0                       | 97       | 97       | 92       | 94       |
| 11  | 64      | 64      | 64      | 0                       | 99       | 98       | 98       | 98       |
| 12  | 65      | 64      | 78      | 0                       | 99       | 99       | 99       | 98       |
| 13  | 57      | 69      | 62      | 1                       | 100      | 100      | 98       | 99       |
| 14  | 60      | 54      | 57      | 1                       | 100      | 100      | 100      | 100      |
| 15  | 57      | 61      | 61      | 1                       | 96       | 94       | 93       | 93       |
| 16  | 97      | 93      | 93      | 0                       | 97       | 98       | 94       | 99       |
| 17  | 118     | 69      | 76      | 0                       | 98       | 98       | 98       | 98       |
| 18  | 78      | 77      | 72      | 0                       | 100      | 99       | 98       | 98       |
| 19  | 83      | 83      | 82      | 0                       | 99       | 97       | 97       | 99       |
| 20  | 63      | 62      | 76      | 0                       | 99       | 99       | 99       | 94       |
| 21  | 66      | 64      | 64      | 1                       | 100      | 94       | 95       | 93       |
| 22  | 83      | 70      | 69      | 1                       | 99       | 99       | 99       | 99       |
| 23  | 83      | 83      | 88      | 0                       | 100      | 100      | 97       | 96       |
| 24  | 65      | 65      | 68      | 0                       | 100      | 100      | 98       | 98       |
| 25  | 60      | 56      | 56      | 1                       | 100      | 98       | 99       | 99       |
| 26  | 64      | 60      | 60      | 1                       | 95       | 98       | 91       | 91       |
| 27  | 82      | 78      | 82      | 0                       | 100      | 100      | 99       | 99       |
| 28  | 49      | 49      | 49      | 1                       | 98       | 99       | 99       | 99       |
| 29  | 51      | 54      | 52      | 1                       | 98       | 99       | 99       | 98       |
| 30  | 52      | 52      | 53      | 1                       | 100      | 99       | 99       | 94       |
| 31  | 77      | 79      | 77      | 0                       | 100      | 100      | 100      | 98       |
| 32  | 64      | 75      | 74      | 1                       | 99       | 99       | 99       | 99       |
| 33  | 58      | 59      | 61      | 1                       | 100      | 100      | 99       | 97       |
| 34  | 62      | 80      | 60      | 0                       | 99       | 99       | 99       | 99       |
| 35  | 75      | 66      | 57      | 1                       | 99       | 100      | 97       | 98       |
| 36  | 63      | 66      | 62      | 0                       | 100      | 100      | 100      | 99       |

| No. | SpO2(T5) | SpO2(T6) | SpO2(T7) | SpO2 Low(<94%) | Assisted breathing (No 0/Yes 1) | Physical response (T1) | Physical response (T2) | Physical response (T3) |
|-----|----------|----------|----------|----------------|---------------------------------|------------------------|------------------------|------------------------|
| 1   | 97       | 97       | 97       | 0              | 0                               | 0                      | 0                      | 0                      |
| 2   | 98       | 98       | 98       | 0              | 0                               | 0                      | 0                      | 0                      |
| 3   | 95       | 98       | 97       | 0              | 0                               | 0                      | 0                      | 0                      |
| 4   | 92       | 92       | 91       | 0              | 0                               | 0                      | 0                      | 0                      |
| 5   | 98       | 98       | 97       | 1              | 0                               | 0                      | 0                      | 0                      |
| 6   | 98       | 98       | 99       | 0              | 0                               | 0                      | 0                      | 0                      |
| 7   | 99       | 98       | 98       | 0              | 0                               | 0                      | 0                      | 0                      |
| 8   | 93       | 94       | 94       | 1              | 1                               | 0                      | 0                      | 0                      |
| 9   | 97       | 97       | 95       | 0              | 0                               | 0                      | 0                      | 0                      |
| 10  | 94       | 94       | 95       | 1              | 0                               | 0                      | 0                      | 0                      |
| 11  | 98       | 98       | 98       | 0              | 0                               | 0                      | 0                      | 0                      |
| 12  | 98       | 98       | 98       | 0              | 0                               | 0                      | 0                      | 0                      |
| 13  | 100      | 100      | 99       | 0              | 0                               | 0                      | 0                      | 0                      |
| 14  | 100      | 99       | 99       | 0              | 0                               | 0                      | 0                      | 0                      |
| 15  | 96       | 97       | 98       | 1              | 0                               | 0                      | 0                      | 0                      |
| 16  | 99       | 99       | 99       | 0              | 1                               | 0                      | 0                      | 0                      |
| 17  | 98       | 100      | 100      | 0              | 0                               | 0                      | 1                      | 0                      |
| 18  | 99       | 99       | 95       | 0              | 0                               | 0                      | 0                      | 1                      |
| 19  | 99       | 99       | 100      | 0              | 1                               | 0                      | 0                      | 0                      |
| 20  | 94       | 94       | 97       | 0              | 0                               | 0                      | 0                      | 0                      |
| 21  | 97       | 95       | 95       | 1              | 0                               | 0                      | 0                      | 0                      |
| 22  | 99       | 99       | 99       | 0              | 0                               | 0                      | 0                      | 1                      |
| 23  | 98       | 98       | 98       | 0              | 1                               | 0                      | 0                      | 0                      |
| 24  | 98       | 98       | 99       | 0              | 0                               | 0                      | 0                      | 0                      |
| 25  | 99       | 100      | 99       | 0              | 0                               | 0                      | 0                      | 0                      |
| 26  | 95       | 96       | 96       | 1              | 0                               | 0                      | 0                      | 0                      |
| 27  | 99       | 99       | 99       | 0              | 1                               | 0                      | 0                      | 0                      |
| 28  | 99       | 99       | 99       | 0              | 0                               | 0                      | 0                      | 0                      |
| 29  | 98       | 97       | 95       | 0              | 1                               | 0                      | 0                      | 0                      |
| 30  | 92       | 98       | 98       | 1              | 1                               | 0                      | 0                      | 0                      |
| 31  | 98       | 99       | 99       | 0              | 0                               | 0                      | 0                      | 0                      |
| 32  | 97       | 99       | 98       | 0              | 1                               | 0                      | 0                      | 0                      |
| 33  | 90       | 96       | 97       | 1              | 1                               | 0                      | 0                      | 0                      |
| 34  | 99       | 99       | 99       | 0              | 0                               | 0                      | 0                      | 0                      |
| 35  | 98       | 99       | 99       | 0              | 1                               | 0                      | 0                      | 0                      |
| 36  | 99       | 100      | 99       | 0              | 0                               | 0                      | 0                      | 0                      |

| No. | Physical response (T4) | Physical response (T5) | Physical response (T6) | Physical response (T7) | Colic (20 minutes after examination ) | Nausea and vomiting (20 minutes after examination ) | Dizziness and headache (20 minutes after examination ) | Unable to stand steadily (after examination for 20 minutes) |
|-----|------------------------|------------------------|------------------------|------------------------|---------------------------------------|-----------------------------------------------------|--------------------------------------------------------|-------------------------------------------------------------|
| 1   | 0                      | 0                      | 0                      | 0                      | 0                                     | 0                                                   | 0                                                      | 0                                                           |
| 2   | 0                      | 0                      | 0                      | 0                      | 0                                     | 0                                                   | 0                                                      | 0                                                           |
| 3   | 1                      | 0                      | 0                      | 0                      | 0                                     | 0                                                   | 0                                                      | 0                                                           |
| 4   | 0                      | 0                      | 0                      | 0                      | 0                                     | 0                                                   | 0                                                      | 0                                                           |
| 5   | 0                      | 0                      | 0                      | 0                      | 0                                     | 0                                                   | 0                                                      | 0                                                           |
| 6   | 0                      | 0                      | 0                      | 0                      | 0                                     | 0                                                   | 0                                                      | 0                                                           |
| 7   | 0                      | 0                      | 0                      | 0                      | 0                                     | 0                                                   | 0                                                      | 0                                                           |
| 8   | 0                      | 0                      | 0                      | 0                      | 0                                     | 0                                                   | 0                                                      | 0                                                           |
| 9   | 0                      | 0                      | 0                      | 0                      | 0                                     | 0                                                   | 0                                                      | 0                                                           |
| 10  | 0                      | 0                      | 1                      | 1                      | 0                                     | 0                                                   | 0                                                      | 0                                                           |
| 11  | 1                      | 0                      | 0                      | 0                      | 0                                     | 0                                                   | 0                                                      | 0                                                           |
| 12  | 0                      | 0                      | 0                      | 0                      | 0                                     | 0                                                   | 0                                                      | 0                                                           |
| 13  | 0                      | 0                      | 0                      | 0                      | 0                                     | 0                                                   | 0                                                      | 0                                                           |
| 14  | 0                      | 0                      | 0                      | 0                      | 0                                     | 0                                                   | 1                                                      | 0                                                           |
| 15  | 1                      | 0                      | 0                      | 0                      | 0                                     | 0                                                   | 0                                                      | 0                                                           |
| 16  | 0                      | 0                      | 0                      | 0                      | 0                                     | 0                                                   | 0                                                      | 0                                                           |
| 17  | 1                      | 0                      | 0                      | 0                      | 0                                     | 0                                                   | 0                                                      | 0                                                           |
| 18  | 0                      | 0                      | 0                      | 0                      | 0                                     | 0                                                   | 1                                                      | 0                                                           |
| 19  | 0                      | 0                      | 0                      | 0                      | 0                                     | 0                                                   | 1                                                      | 0                                                           |
| 20  | 1                      | 0                      | 0                      | 0                      | 0                                     | 0                                                   | 0                                                      | 0                                                           |
| 21  | 1                      | 0                      | 0                      | 0                      | 0                                     | 0                                                   | 0                                                      | 0                                                           |
| 22  | 0                      | 0                      | 0                      | 0                      | 0                                     | 0                                                   | 0                                                      | 0                                                           |
| 23  | 0                      | 0                      | 0                      | 0                      | 0                                     | 0                                                   | 1                                                      | 0                                                           |
| 24  | 0                      | 0                      | 0                      | 0                      | 0                                     | 0                                                   | 0                                                      | 0                                                           |
| 25  | 1                      | 1                      | 0                      | 0                      | 0                                     | 0                                                   | 0                                                      | 0                                                           |
| 26  | 1                      | 0                      | 0                      | 0                      | 0                                     | 0                                                   | 0                                                      | 0                                                           |
| 27  | 0                      | 0                      | 0                      | 0                      | 0                                     | 0                                                   | 0                                                      | 0                                                           |
| 28  | 0                      | 0                      | 0                      | 0                      | 0                                     | 0                                                   | 0                                                      | 0                                                           |
| 29  | 0                      | 1                      | 0                      | 0                      | 0                                     | 0                                                   | 0                                                      | 0                                                           |
| 30  | 0                      | 0                      | 0                      | 0                      | 0                                     | 0                                                   | 0                                                      | 0                                                           |
| 31  | 0                      | 0                      | 0                      | 0                      | 0                                     | 0                                                   | 0                                                      | 0                                                           |
| 32  | 1                      | 1                      | 0                      | 0                      | 0                                     | 0                                                   | 0                                                      | 0                                                           |
| 33  | 0                      | 0                      | 0                      | 0                      | 0                                     | 0                                                   | 0                                                      | 0                                                           |
| 34  | 0                      | 0                      | 0                      | 0                      | 0                                     | 0                                                   | 0                                                      | 0                                                           |
| 35  | 0                      | 1                      | 0                      | 0                      | 0                                     | 0                                                   | 0                                                      | 0                                                           |
| 36  | 1                      | 0                      | 0                      | 0                      | 1                                     | 0                                                   | 0                                                      | 0                                                           |

| No. | Colic (4 hours after examination ) | Nausea and vomiting (4h after examination ) | Dizziness and headache (4 hours after examination ) | Unsteady standing (4 hours after examination ) | Patient satisfaction( 0-5) |
|-----|------------------------------------|---------------------------------------------|-----------------------------------------------------|------------------------------------------------|----------------------------|
| 1   | 0                                  | 0                                           | 0                                                   | 0                                              | 3                          |
| 2   | 0                                  | 0                                           | 0                                                   | 0                                              | 3                          |
| 3   | 0                                  | 0                                           | 0                                                   | 0                                              | 3                          |
| 4   | 0                                  | 0                                           | 0                                                   | 0                                              | 3                          |
| 5   | 0                                  | 0                                           | 0                                                   | 0                                              | 3                          |
| 6   | 0                                  | 0                                           | 0                                                   | 0                                              | 3                          |
| 7   | 0                                  | 0                                           | 0                                                   | 0                                              | 3                          |
| 8   | 0                                  | 0                                           | 0                                                   | 0                                              | 3                          |
| 9   | 0                                  | 0                                           | 0                                                   | 0                                              | 3                          |
| 10  | 0                                  | 0                                           | 0                                                   | 0                                              | 3                          |
| 11  | 0                                  | 0                                           | 0                                                   | 0                                              | 5                          |
| 12  | 0                                  | 0                                           | 0                                                   | 0                                              | 5                          |
| 13  | 0                                  | 0                                           | 0                                                   | 0                                              | 5                          |
| 14  | 0                                  | 0                                           | 0                                                   | 0                                              | 4                          |
| 15  | 0                                  | 0                                           | 0                                                   | 0                                              | 5                          |
| 16  | 0                                  | 0                                           | 0                                                   | 0                                              | 5                          |
| 17  | 0                                  | 0                                           | 0                                                   | 0                                              | 5                          |
| 18  | 0                                  | 0                                           | 0                                                   | 0                                              | 4                          |
| 19  | 0                                  | 0                                           | 0                                                   | 0                                              | 4                          |
| 20  | 0                                  | 0                                           | 0                                                   | 0                                              | 5                          |
| 21  | 0                                  | 0                                           | 0                                                   | 0                                              | 5                          |
| 22  | 0                                  | 0                                           | 0                                                   | 0                                              | 5                          |
| 23  | 0                                  | 0                                           | 0                                                   | 0                                              | 4                          |
| 24  | 0                                  | 0                                           | 0                                                   | 0                                              | 5                          |
| 25  | 0                                  | 0                                           | 0                                                   | 0                                              | 5                          |
| 26  | 0                                  | 0                                           | 0                                                   | 0                                              | 5                          |
| 27  | 0                                  | 0                                           | 0                                                   | 0                                              | 5                          |
| 28  | 0                                  | 0                                           | 0                                                   | 0                                              | 5                          |
| 29  | 0                                  | 0                                           | 0                                                   | 0                                              | 5                          |
| 30  | 0                                  | 0                                           | 0                                                   | 0                                              | 5                          |
| 31  | 0                                  | 0                                           | 0                                                   | 0                                              | 5                          |
| 32  | 0                                  | 0                                           | 0                                                   | 0                                              | 5                          |
| 33  | 0                                  | 0                                           | 1                                                   | 0                                              | 4                          |
| 34  | 0                                  | 0                                           | 0                                                   | 0                                              | 5                          |
| 35  | 0                                  | 0                                           | 0                                                   | 0                                              | 5                          |
| 36  | 0                                  | 0                                           | 0                                                   | 0                                              | 3                          |
